# Supplementary material for: Colloidal nanocrystal superlattices as phononic crystals: plane wave expansion modeling of phonon band structure
Source: Royal Society of Chemistry journal article supplement (doi:10.1039/c6ra03876j), 2016-01-01
Supplement: c6ra03876j1.pdf [file c6ra03876j1.pdf]

## Electronic Supplementary Information

# Colloidal Nanocrystal Superlattices as Phononic Crystals: Plane Wave Expansion Modeling of Phonon Band Structure

Seid M. Sadat<sup>1</sup> and Robert Y. Wang<sup>1\*</sup>

<sup>1</sup>*School for Engineering of Matter, Transport & Energy, Arizona State University, Tempe, Arizona 85287*

*E-mail: rywang@asu.edu*

## Plane Wave Expansion Methodology

To determine the phonon band structure using the plane wave expansion method, we begin with the 3-dimensional elastic wave equation in terms of Lamé coefficients for a locally isotropic medium:<sup>1-3</sup>

$$\frac{\partial^2 u^i}{\partial t^2} = \frac{1}{\rho} \left[ \frac{\partial}{\partial x_i} \left( \lambda \frac{\partial u^l}{\partial x_l} \right) + \frac{\partial}{\partial x_l} \left( \mu \left[ \frac{\partial u^i}{\partial x_l} + \frac{\partial u^l}{\partial x_i} \right] \right) \right], i, l = 1, 2, 3 \quad (1)$$

where  $t$  is time,  $i$  and  $l$  are indices (1, 2, or 3), and  $u^i$ ,  $u^l$ ,  $x_i$  and  $x_l$  are the Cartesian components of the displacement vector,  $\mathbf{u}(\mathbf{r})$ , and position vector,  $\mathbf{r}$ , respectively. The spatially varying density, first Lamé coefficient, and second Lamé coefficient are represented by  $\rho(\mathbf{r})$ ,  $\lambda(\mathbf{r})$ , and  $\mu(\mathbf{r})$ , respectively. Since a phononic crystal is periodic, any given local material property,  $f(\mathbf{r})$ , is also periodic with respect to all lattice vectors,  $\mathbf{R}$ .

$$f(\mathbf{r} + \mathbf{R}) = f(\mathbf{r}) \quad (2a)$$

$$\mathbf{R} = n_1 \mathbf{a}_1 + n_2 \mathbf{a}_2 + n_3 \mathbf{a}_3 \quad (2b)$$

where  $f(\mathbf{r})$  is representative of  $\rho(\mathbf{r})$ ,  $\lambda(\mathbf{r})$ , or  $\mu(\mathbf{r})$  and  $n_i$  is an integer. Since this paper focuses on face-centered cubic systems, we use the following lattice vectors:

$$\mathbf{a}_1 = \frac{a}{2} (\hat{x} + \hat{z}) \quad (3a)$$

$$\mathbf{a}_2 = \frac{a}{2} (\hat{x} + \hat{y}) \quad (3b)$$

$$\mathbf{a}_3 = \frac{a}{2} (\hat{y} + \hat{z}) \quad (3c)$$

where  $a$  represents the lattice constant of the conventional face-centered cubic lattice. We construct a triclinic primitive unit cell with 8 spheres at the corners using these three vectors (Figure S1b). Since  $f(\mathbf{r})$  is a periodic function in space, it can be expanded in a 3-D Fourier series exploiting unit cell vectors and reciprocal lattice vectors (RLVs):

$$f(\mathbf{r}) = \sum_{\mathbf{G}} f_{\mathbf{G}} e^{j\mathbf{G} \cdot \mathbf{r}} \quad (4)$$

where

$$\mathbf{G} = m_1 \mathbf{b}_1 + m_2 \mathbf{b}_2 + m_3 \mathbf{b}_3 \quad (5)$$

$$\mathbf{b}_1 = 2\pi \frac{\mathbf{a}_2 \times \mathbf{a}_3}{\mathbf{a}_1 \cdot (\mathbf{a}_2 \times \mathbf{a}_3)}, \quad \mathbf{b}_1 = \frac{2\pi}{a} (\hat{k}_x - \hat{k}_y + \hat{k}_z) \quad (6a)$$

$$\mathbf{b}_2 = 2\pi \frac{\mathbf{a}_3 \times \mathbf{a}_1}{\mathbf{a}_2 \cdot (\mathbf{a}_3 \times \mathbf{a}_1)}, \quad \mathbf{b}_2 = \frac{2\pi}{a} (\hat{k}_x + \hat{k}_y - \hat{k}_z) \quad (6b)$$

$$\mathbf{b}_3 = 2\pi \frac{\mathbf{a}_1 \times \mathbf{a}_2}{\mathbf{a}_3 \cdot (\mathbf{a}_1 \times \mathbf{a}_2)}, \quad \mathbf{b}_3 = \frac{2\pi}{a} (\hat{k}_y - \hat{k}_x + \hat{k}_z) \quad (6c)$$

where  $\mathbf{G}$  is a reciprocal lattice vector,  $m_i$  is an integer, and  $\mathbf{b}_i$  are reciprocal lattice unit vectors. Since the local material properties are periodic functions of the position vector, the Floquet-Bloch theorem<sup>4</sup> tells us that the eigensolutions of the wave equation are modulated sinusoids of the form:

$$u(\mathbf{r}) = u_{\mathbf{k}}(\mathbf{r}) e^{j(\mathbf{k} \cdot \mathbf{r})} \quad (7)$$

where

$$u_{\mathbf{k}}(\mathbf{r}) = u_{\mathbf{k}}(\mathbf{r} + \sum_{i=1,2,3} n_i \mathbf{a}_i) \quad (8)$$

The displacements,  $u_{\mathbf{k}}$ , are also periodic and can be expanded in a 3-D Fourier series:

$$u(\mathbf{r}) = (\sum_{\mathbf{G}} u_{\mathbf{k}+\mathbf{G}}) e^{j\mathbf{k} \cdot \mathbf{r}} = \sum_{\mathbf{G}} u_{\mathbf{k}+\mathbf{G}} e^{j(\mathbf{k}+\mathbf{G}) \cdot \mathbf{r}} \quad (9)$$

We consider plane wave solutions of the form shown in Equation 10, where  $j$  is the imaginary unit and  $\omega$  is angular frequency:

$$u = e^{j(\mathbf{k} \cdot \mathbf{r} - \omega t)} \quad (10)$$

By substituting Equations 4, 9, and 10 into Equation 1, we can arrive at the following equation:

$$\begin{aligned} \omega^2 u_{\mathbf{k}_0+\mathbf{G}}^i = \sum_{\mathbf{G}'} \left[ \sum_{l,G} \rho_{\mathbf{G}-\mathbf{G}'}^{-1} [\lambda_{\mathbf{G}''-\mathbf{G}'}(\mathbf{k}_0 + \mathbf{G}')_l (\mathbf{k}_0 + \mathbf{G}'')_i \right. \\ \left. + \mu_{\mathbf{G}''-\mathbf{G}'}(\mathbf{k}_0 + \mathbf{G}')_i (\mathbf{k}_0 + \mathbf{G}'')_l] u_{\mathbf{k}_0+\mathbf{G}'}^l \right. \\ \left. + \sum_{\mathbf{G}''} \left( \rho_{\mathbf{G}-\mathbf{G}''}^{-1} \mu_{\mathbf{G}''-\mathbf{G}'} \sum_n (\mathbf{k}_0 + \mathbf{G}')_n (\mathbf{k}_0 + \mathbf{G}'')_n \right) u_{\mathbf{k}_0+\mathbf{G}'}^i \right] \end{aligned} \quad (11)$$

where  $\mathbf{k}_0$  is a wave vector,  $\mathbf{G}$ ,  $\mathbf{G}'$  and  $\mathbf{G}''$  are reciprocal lattice vectors, and  $i$ ,  $l$ , and  $n$  are indices that vary between 1, 2, and 3. Equation 11 can be rewritten in an eigenvector-eigenvalue matrix form,  $AU = \Lambda U$ , where  $U$  is the eigenvector matrix,  $\Lambda$  is eigenvalue matrix, and  $A$  is a matrix of coefficients.

$$A_{G_i, G'_l} = \sum_{\mathbf{G}''} \rho_{\mathbf{G}_i - \mathbf{G}''}^{-1} \left[ \begin{array}{c} \lambda_{\mathbf{G}'' - \mathbf{G}'_l} \left[ \begin{array}{ccc} (\mathbf{k}_0 + \mathbf{G}'')_x (\mathbf{k}_0 + \mathbf{G}'_l)_x & (\mathbf{k}_0 + \mathbf{G}'')_x (\mathbf{k}_0 + \mathbf{G}'_l)_y & (\mathbf{k}_0 + \mathbf{G}'')_x (\mathbf{k}_0 + \mathbf{G}'_l)_z \\ (\mathbf{k}_0 + \mathbf{G}'')_y (\mathbf{k}_0 + \mathbf{G}'_l)_x & (\mathbf{k}_0 + \mathbf{G}'')_y (\mathbf{k}_0 + \mathbf{G}'_l)_y & (\mathbf{k}_0 + \mathbf{G}'')_y (\mathbf{k}_0 + \mathbf{G}'_l)_z \\ (\mathbf{k}_0 + \mathbf{G}'')_z (\mathbf{k}_0 + \mathbf{G}'_l)_x & (\mathbf{k}_0 + \mathbf{G}'')_z (\mathbf{k}_0 + \mathbf{G}'_l)_y & (\mathbf{k}_0 + \mathbf{G}'')_z (\mathbf{k}_0 + \mathbf{G}'_l)_z \end{array} \right] \\ + \mu_{\mathbf{G}'' - \mathbf{G}'_l} \left[ \begin{array}{ccc} (\mathbf{k}_0 + \mathbf{G}'_l)_x (\mathbf{k}_0 + \mathbf{G}'')_x & (\mathbf{k}_0 + \mathbf{G}'_l)_x (\mathbf{k}_0 + \mathbf{G}'')_y & (\mathbf{k}_0 + \mathbf{G}'_l)_x (\mathbf{k}_0 + \mathbf{G}'')_z \\ (\mathbf{k}_0 + \mathbf{G}'_l)_y (\mathbf{k}_0 + \mathbf{G}'')_x & (\mathbf{k}_0 + \mathbf{G}'_l)_y (\mathbf{k}_0 + \mathbf{G}'')_y & (\mathbf{k}_0 + \mathbf{G}'_l)_y (\mathbf{k}_0 + \mathbf{G}'')_z \\ (\mathbf{k}_0 + \mathbf{G}'_l)_z (\mathbf{k}_0 + \mathbf{G}'')_x & (\mathbf{k}_0 + \mathbf{G}'_l)_z (\mathbf{k}_0 + \mathbf{G}'')_y & (\mathbf{k}_0 + \mathbf{G}'_l)_z (\mathbf{k}_0 + \mathbf{G}'')_z \end{array} \right] \\ + \mu_{\mathbf{G}'' - \mathbf{G}'_l} (\sum_n (\mathbf{k}_0 + \mathbf{G}'_l)_n (\mathbf{k}_0 + \mathbf{G}'')_n) I_3 \end{array} \right] \quad (12a)$$

$$A = \left[ A_{G_i, G'_l} \right]_{i,l \in 1 \dots M} \quad (12b)$$

$$U = \begin{bmatrix} u_{\mathbf{k}_0 - \mathbf{G}_1}^{1,x} & & u_{\mathbf{k}_0 - \mathbf{G}_1}^{3M,x} \\ u_{\mathbf{k}_0 - \mathbf{G}_1}^{1,y} & \dots & u_{\mathbf{k}_0 - \mathbf{G}_1}^{3M,y} \\ u_{\mathbf{k}_0 - \mathbf{G}_1}^{1,z} & & u_{\mathbf{k}_0 - \mathbf{G}_1}^{3M,z} \\ \vdots & & \vdots \\ \vdots & \dots & \vdots \\ u_{\mathbf{k}_0 - \mathbf{G}_M}^{1,x} & & u_{\mathbf{k}_0 - \mathbf{G}_M}^{3M,x} \\ u_{\mathbf{k}_0 - \mathbf{G}_M}^{1,y} & \dots & u_{\mathbf{k}_0 - \mathbf{G}_M}^{3M,y} \\ u_{\mathbf{k}_0 - \mathbf{G}_M}^{1,z} & & u_{\mathbf{k}_0 - \mathbf{G}_M}^{3M,z} \end{bmatrix} \quad (12c)$$

$$\Lambda = \begin{bmatrix} \omega_1^2 & 0 & 0 \\ 0 & \cdot & 0 \\ 0 & 0 & \cdot \\ 0 & 0 & \omega_{3M}^2 \end{bmatrix} \quad (12d)$$

where  $(\mathbf{k}_0 + \mathbf{G})_i$  refers to the component of  $(\mathbf{k}_0 + \mathbf{G})$  in direction  $i$  and  $M$  represents the total number of Fourier coefficients utilized in each of the three dimensions. Solving the above matrix equation yields the eigenvalues,  $\omega$ , of the eigenvector,  $\mathbf{k}_\theta$ . Varying  $\mathbf{k}_\theta$  throughout the Brillouin zone then allows the phonon band diagram to be mapped out.

In practice, a finite number of RLVs must be chosen when doing the Fourier expansion shown in Equation 4. To do this we use a centered numerical Fourier transform with 301 terms (i.e., -150, ..., 0, ..., 150) for each of the three dimensions. For our numerical Fourier transform we utilized the FFTW package.<sup>5</sup> However, using all 301 term in Equation 12 would yield intractably large matrices. For computational purposes, we utilize a centered  $2m + 1$  subset of these terms (i.e.  $-m, -(m-1), \dots, 0, \dots, m-1, m$ ). The total number of Fourier coefficients utilized in each dimension is then  $M = 2m + 1$ . For the calculations in our paper, we use  $m = 8$  (i.e.  $M = 17$ ) in each of the three dimensions, which leads to a total number of 729 RLVs for our phononic band diagram calculations. We conducted a numerical convergence test by systematically increasing the value of  $m$  in a model phononic crystal system. We found that increasing  $m$  beyond 8 led to very small  $\sim 1\%$  changes in the frequencies of the phonon bands (Figure S2). We also confirmed the numerical accuracy of our code by benchmarking it against PWE results in the literature (Figure S2).<sup>1</sup>

For the purposes of mapping out the phonon band diagram, we choose  $\mathbf{k}_\theta$  values along the edges of the irreducible first Brillouin zone (Figure S1C). Table 1 shows the Cartesian coordinates of the symmetry points of the Brillouin zone. We moved  $\mathbf{k}_\theta$  along the path of X-L-U- $\Gamma$ -X-W-K and chose 20 points along each segment. We utilized the parallel computing library, Message Passing Interface (MPI),<sup>6</sup> to expedite computational time. We also structured our code to separate our chosen  $\mathbf{k}_\theta$  points among multiple cores. This allows the eigenfrequencies of multiple  $\mathbf{k}_\theta$  points to be computed in parallel, and leads to a decrease in computational time by a factor of  $1/n$ , where  $n$  is the number of cores.

### **Phononic Band Gap Characteristics as a Function of Nanocrystal Core Volume Fraction**

The main text of this paper presents the phononic band gap characteristics as a function of nanocrystal core diameter,  $d$ , and interparticle distance,  $L$ . Since the interparticle distance is determined by the organic ligand length, varying  $d$  and  $L$  is equivalent to varying the nanocrystal core volume fraction. The

relationship between nanocrystal core volume fraction is given by the equation below and is also illustrated in Figure S3.

$$\text{Nanocrystal Core Volume Fraction} = \frac{\pi}{3\sqrt{2}} \left( \frac{d}{d+L} \right)^3 \quad (13)$$

In some instances, it may be more convenient to see the phononic band gap characteristics as a function of nanocrystal core volume fraction instead of nanocrystal diameter. This data is shown in Figures S4 and S5 below (which are equivalent to Figures 4 and 5 in the main text).

### **The Effect of Poisson's Ratio on the Phononic Band Gap**

We calculated the impact of the nanocrystal core Poisson's ratio,  $\nu_{\text{NC Core}}$ , and the ligand matrix Poisson's ratio,  $\nu_{\text{ligand}}$ , on the phononic band gap center frequency and width. We found that varying Poisson's ratio from 0.1 – 0.4 has only a minor effect on the band gap characteristics (Figure S6).

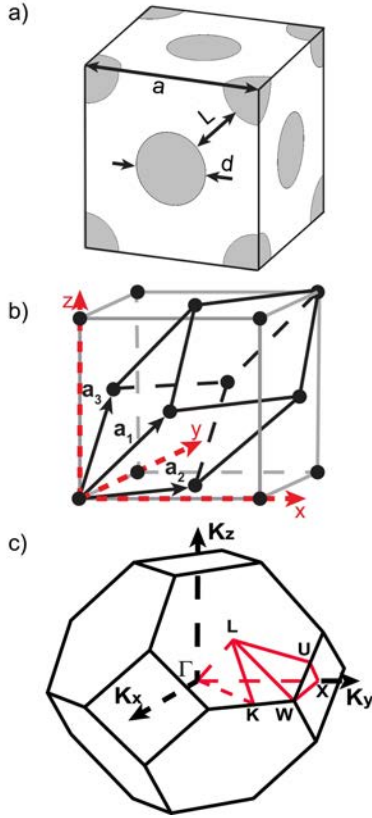

**Figure S1.** (a) Schematic of the conventional unit cell for a face-centered cubic lattice with relevant geometrical parameters labeled: interparticle distance,  $L$ , lattice constant,  $a$ , and nanocrystal core diameter,  $d$ . (b) Schematic of a primitive unit cell (black lines) for a face-centered cubic lattice and corresponding primitive cell lattice vectors,  $\mathbf{a}_1$ ,  $\mathbf{a}_2$ , and  $\mathbf{a}_3$ . (c) Schematic of the first Brillouin zone (black lines) and the irreducible region of the first Brillouin zone (red lines).

| Point    | Cartesian Coordinates, $[\hat{k}_x, \hat{k}_y, \hat{k}_z]$ |
|----------|------------------------------------------------------------|
| $\Gamma$ | $[0,0,0]$                                                  |
| X        | $[0, \frac{2\pi}{a}, 0]$                                   |
| L        | $[\frac{\pi}{a}, \frac{\pi}{a}, \frac{\pi}{a}]$            |
| W        | $[\frac{\pi}{a}, \frac{2\pi}{a}, 0]$                       |
| U        | $[\frac{\pi}{2a}, \frac{2\pi}{a}, \frac{\pi}{2a}]$         |
| K        | $[\frac{3\pi}{2a}, \frac{3\pi}{2a}, 0]$                    |

**Table 1.** The Cartesian coordinates of the key symmetry points in the Brillouin zone of a face-centered cubic lattice.

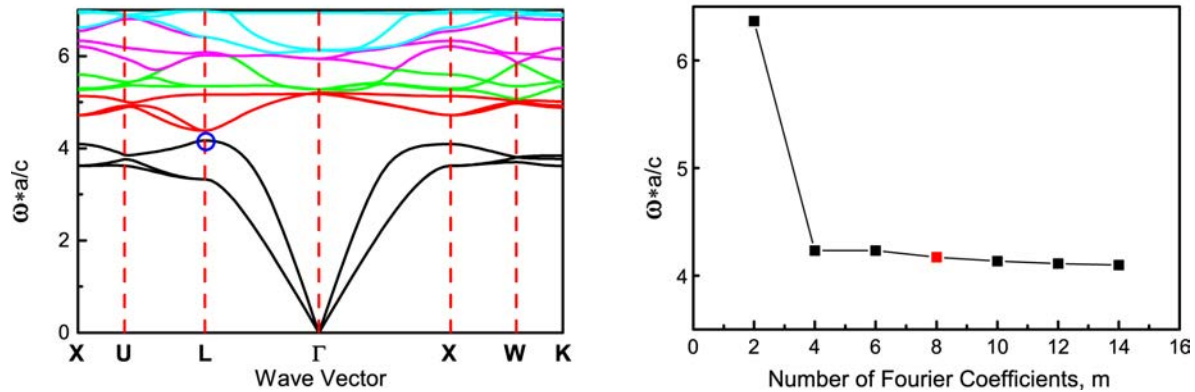

**Figure S2.** (a) The phonon band diagram of Au spheres in a Si matrix for a face-centered cubic lattice. Note that we have used normalized frequency  $\omega^*a/c$  ( $c$  is the transverse speed of sound in the matrix material) in this band diagram. This band diagram agrees with the PWE results in Reference 1 and confirms the numerical accuracy of our code. (b) The normalized frequency of the 3rd band at symmetry point L as a function of the parameter,  $m$ . Increasing  $m$  beyond the value used in this paper ( $m = 8$ ) leads to negligible changes in phonon frequency. For clarity we have used a blue circle in part (a) to mark the frequency location of the 3<sup>rd</sup> band at symmetry point L.

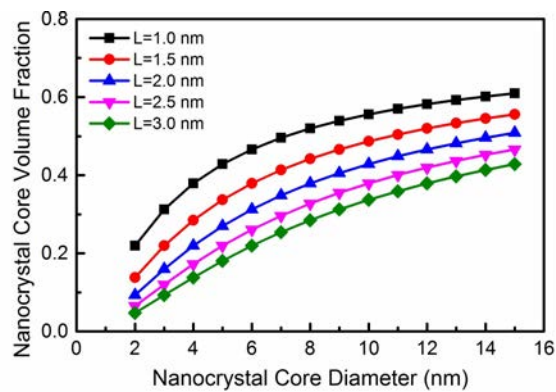

**Figure S3.** The nanocrystal core volume fraction in a nanocrystal superlattice as a function of nanocrystal core diameter,  $d$ , and interparticle distance,  $L$ .

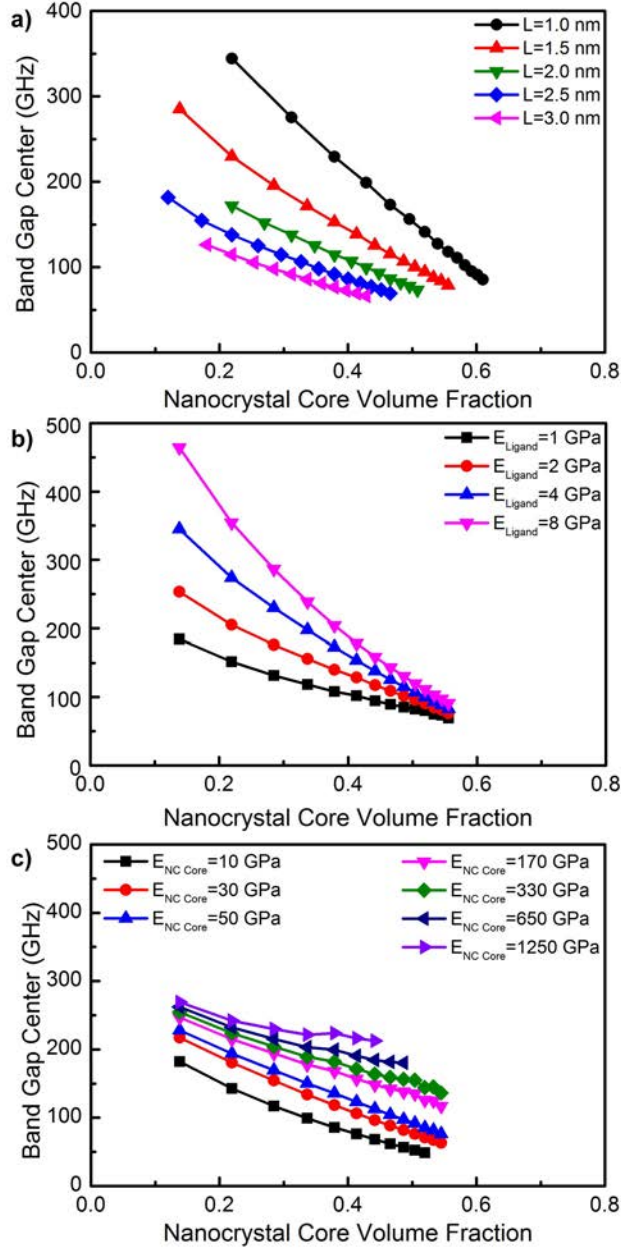

**Figure S4.** The effect of nanocrystal core volume fraction on the center frequency of the phononic band gap for: (a) varying interparticle distance,  $L$ ; (b) varying elastic modulus of the ligand matrix,  $E_{ligand}$ ; and (c) varying elastic modulus of the nanocrystal core,  $E_{NC Core}$ . Unless otherwise specified,  $L$ ,  $E_{ligand}$ , and  $E_{NC Core}$  are fixed at 1.5 nm, 2.6 GPa, and 54 GPa, respectively.

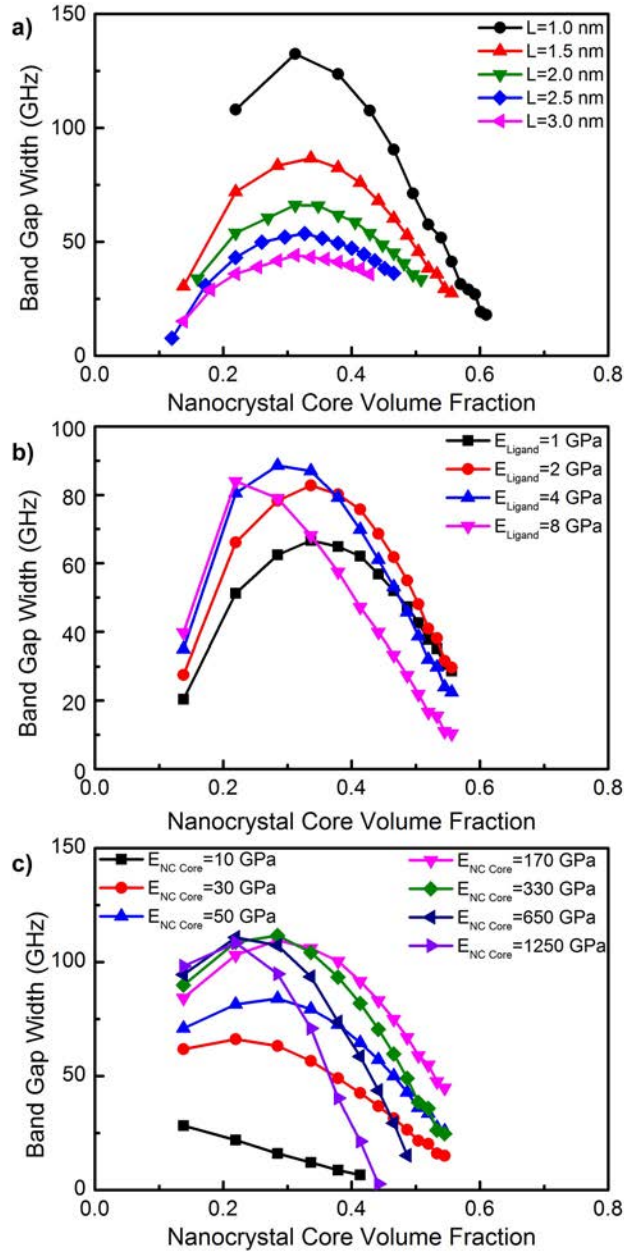

**Figure S5.** The effect of nanocrystal core volume fraction on the phononic band gap width for: (a) varying interparticle distance,  $L$ ; (b) varying elastic modulus of the ligand matrix,  $E_{Ligand}$ ; and (c) varying elastic modulus of the nanocrystal core,  $E_{NC Core}$ . Unless otherwise specified,  $L$ ,  $E_{Ligand}$ , and  $E_{NC Core}$  are fixed at 1.5 nm, 2.6 GPa, and 54 GPa, respectively.



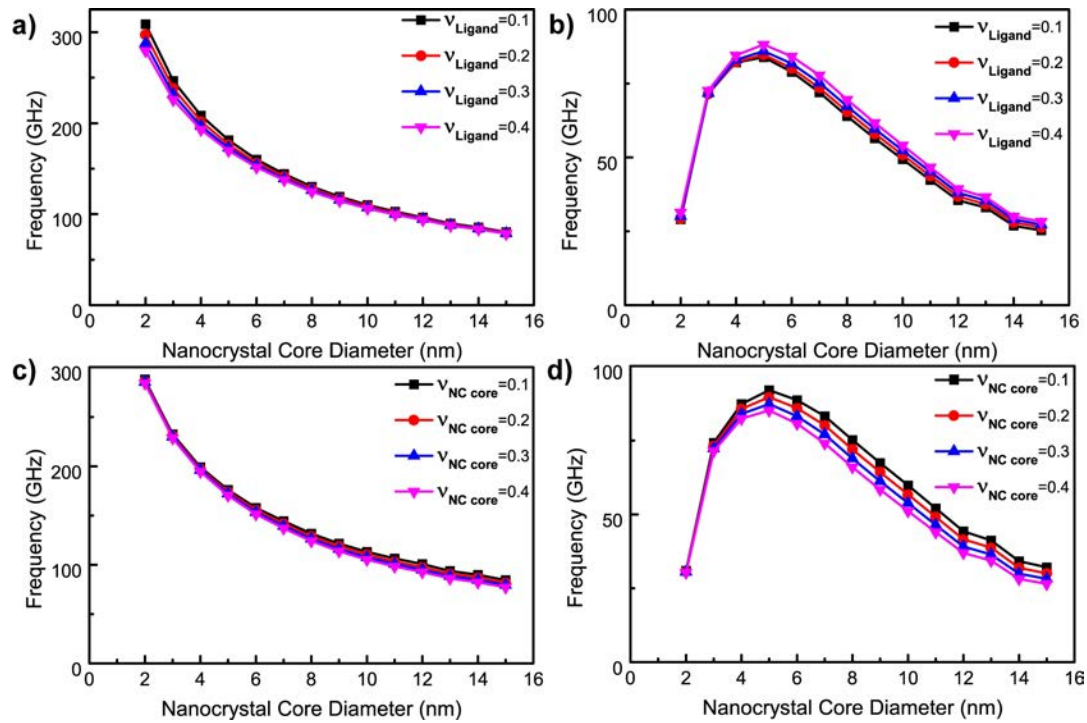

**Figure S6.** The effect of ligand Poisson ratio,  $\nu_{ligands}$ , on the (a) phononic band gap center frequency and (b) phononic band gap width; and the effect of nanocrystal core Poisson ratio,  $\nu_{NC\ Core}$ , on the (a) phononic band gap center frequency and (b) phononic band gap width. In parts (a – d), the following parameters are used:  $L = 1.5$  nm,  $E_{ligand} = 2.6$  GPa, and  $E_{NC\ Core} = 54$  GPa.

## References

1. E. N. Economou and M. Sigalas, *The Journal of the Acoustical Society of America*, 1994, **95**, 1734-1740.
2. H. Ibach, H. Lüth, L. Mihaly and D. Mandrus, *American Journal of Physics*, 1992, **60**, 1053-1054.
3. D. W. Wright, PhD Thesis, University of Toronto, 2010.
4. D. Sjöberg, C. Engström, G. Kristensson, D. J. Wall and N. Wellander, *Multiscale Modeling & Simulation*, 2005, **4**, 149-171.
5. FFTW, (<http://www.fftw.org/>).
6. Open MPI: Open Source High Performance Computing, (<https://www.open-mpi.org/>).
